# Supplementary material
Source: Springer Nature journal article supplement (https://www.springerprofessional.de/resource/supplementary/13638_2014_999_MOESM10_ESM.pdf/11898978)

Average coded BER with 64QAM-1/2 for 3 best resource blocks

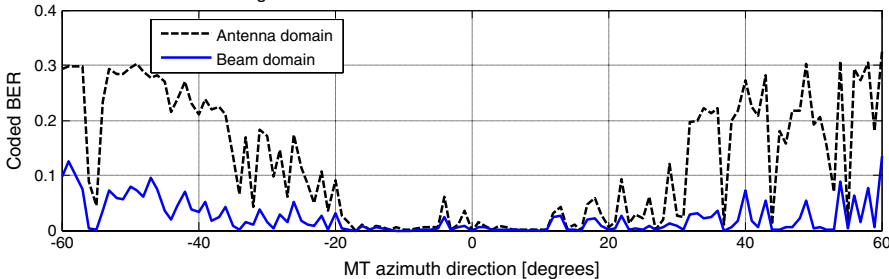

Total throughput of 2x2 Spatial Multiplexing with 64QAM-1/2

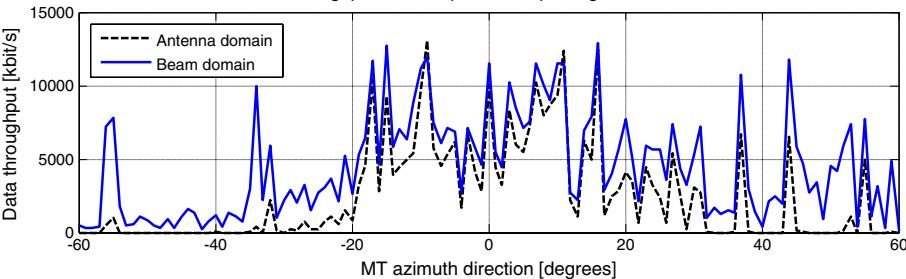

Supplement: MOESM10 [file 11898978]
